# Supplementary figures and images for: Effect of interventions to reduce potentially inappropriate use of drugs in nursing homes: a systematic review of randomised controlled trials
Source: Springer Nature journal article supplement (doi:10.1186/1471-2318-11-16), 2011-04-17

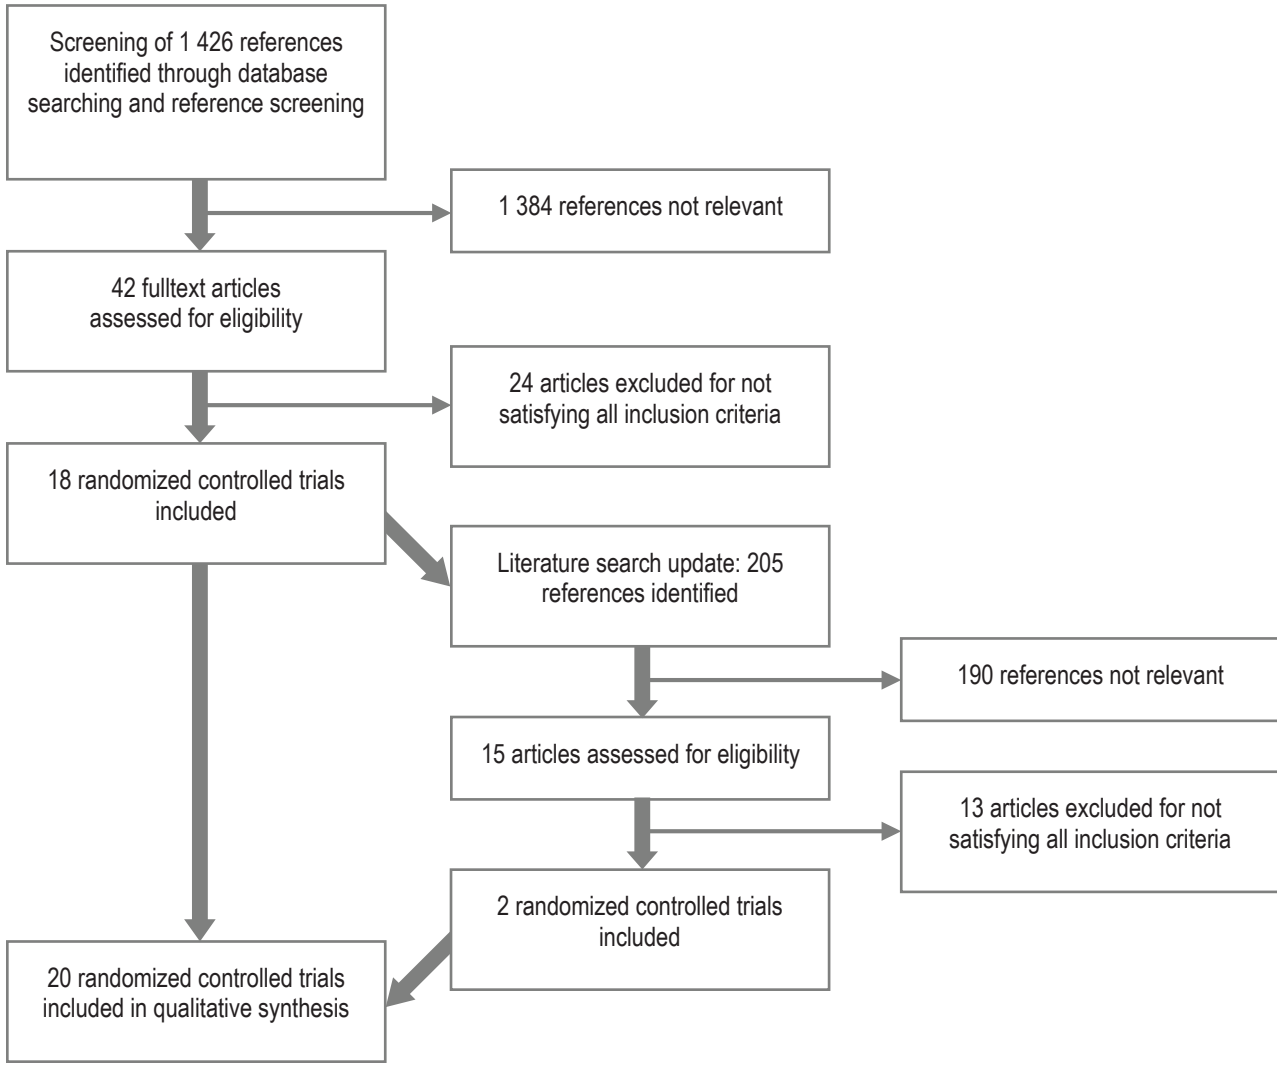

Supplement: 12877_2010_596_MOESM2_ESM.pdf [file 12877_2010_596_MOESM2_ESM.pdf]
